# Supplementary material for: Protecting Zn anodes by atomic layer deposition of ZrO2 to extend the lifetime of aqueous Zn-ion batteries
Source: Royal Society of Chemistry journal article supplement (doi:10.1039/d3ya00400g), 2023-12-07
Supplement: d3ya00400g1.pdf [file d3ya00400g1.pdf]

Supporting Information

**Protecting Zn Anode by Atomic Layer Deposition of ZrO<sub>2</sub> to Extend the Lifetime of  
Aqueous Zn-ion Batteries**

Shichen Sun, Yeting Wen, Aidan Billings, Roya Rajabi, Boyu Wang, Kangkang Zhang, Kevin  
Huang\*

Department of Mechanical Engineering, University of South Carolina, Columbia, SC29201,  
USA

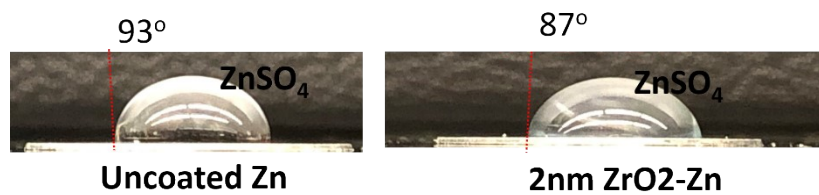

Figure S1. Contact angle of 2 M ZnSO<sub>4</sub> on zinc foil with no coating and 2nm by ALD-ZrO<sub>2</sub>

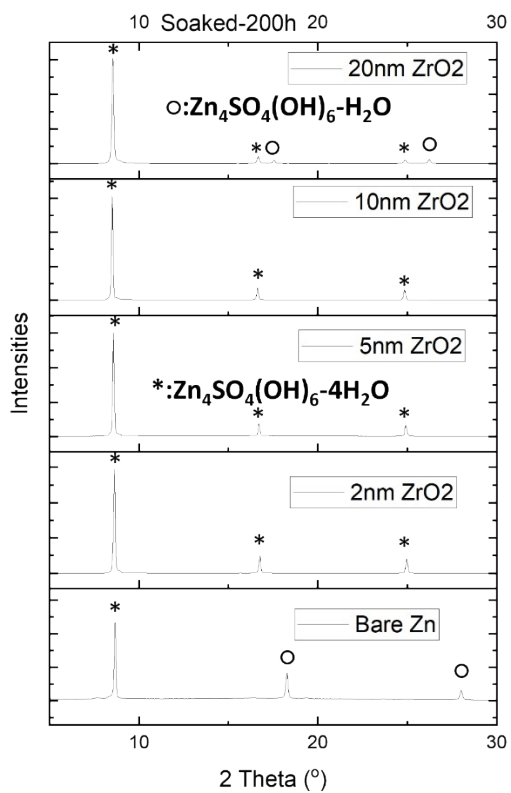

Figure S2. XRD of zinc foils after soaking in 2 M ZnSO<sub>4</sub> for 200h with no coating, 2 to 20nm ALD-ZrO<sub>2</sub> coatings, respectively.

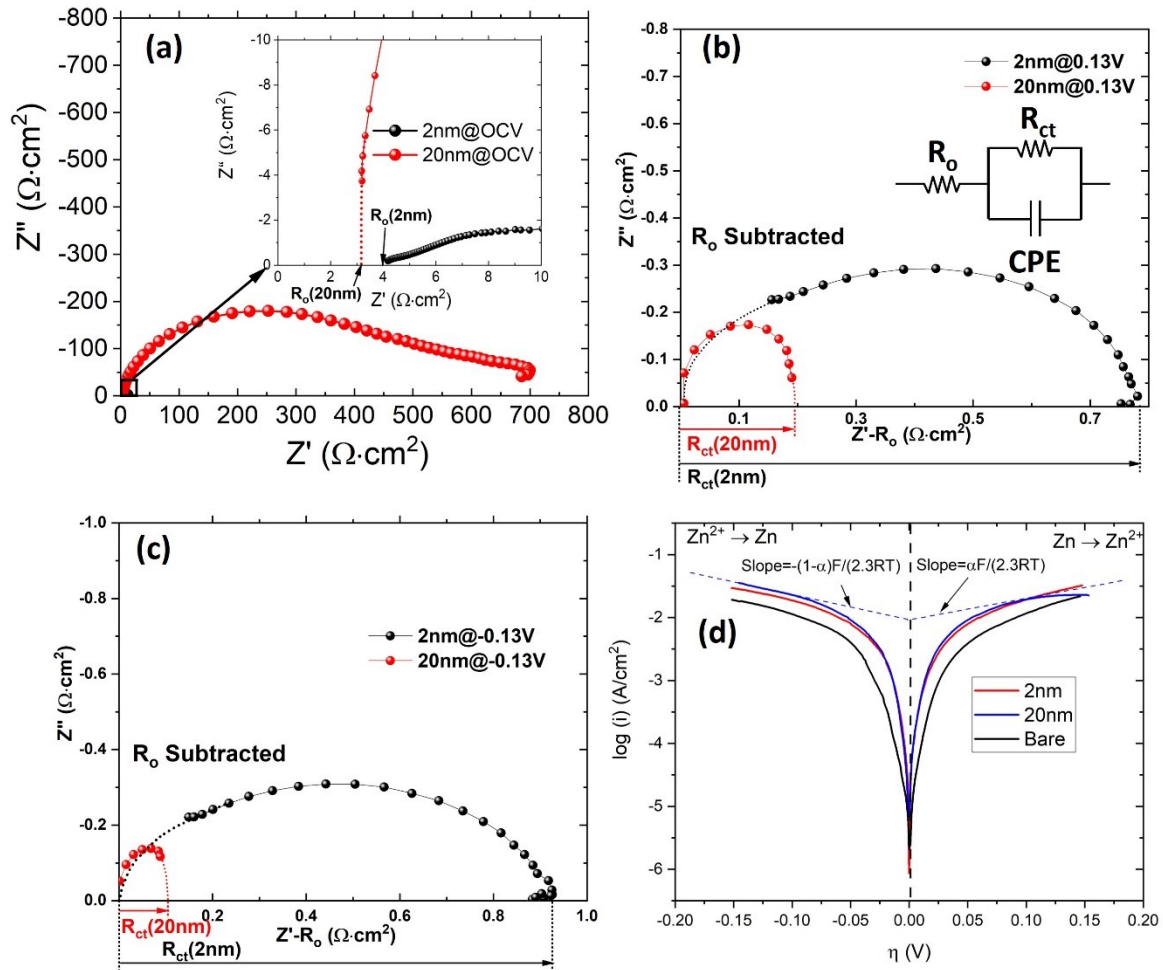

Figure S3. EIS spectra under (a) OCV, (b) 0.13V bias and (c) -0.13V bias and (d) Tafel plots from potential dynamics of 3-electrode cell using uncoated and ALD-ZrO<sub>2</sub>@Zn as WE. ALD-ZrO<sub>2</sub> thickness: 2 and 20 nm.

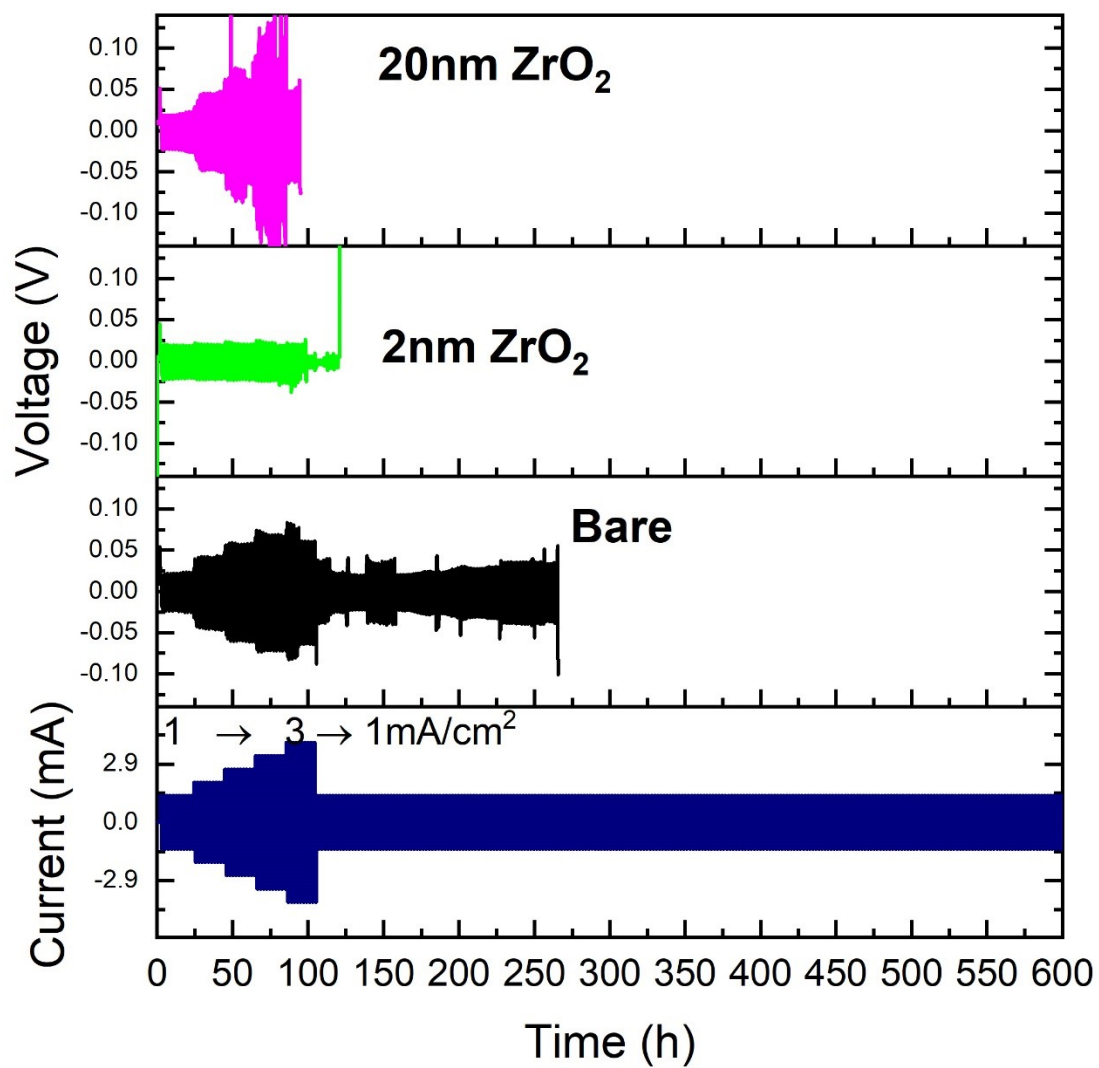

Figure S4. Cycling stability of symmetrical coin cells at  $\pm 1$  to  $\pm 3$  mA/cm<sup>2</sup> with 2 M ZnSO<sub>4</sub>/glass fiber separator as electrolyte and Zn and 2&20 nmALD-ZrO<sub>2</sub>@Zn as electrodes.

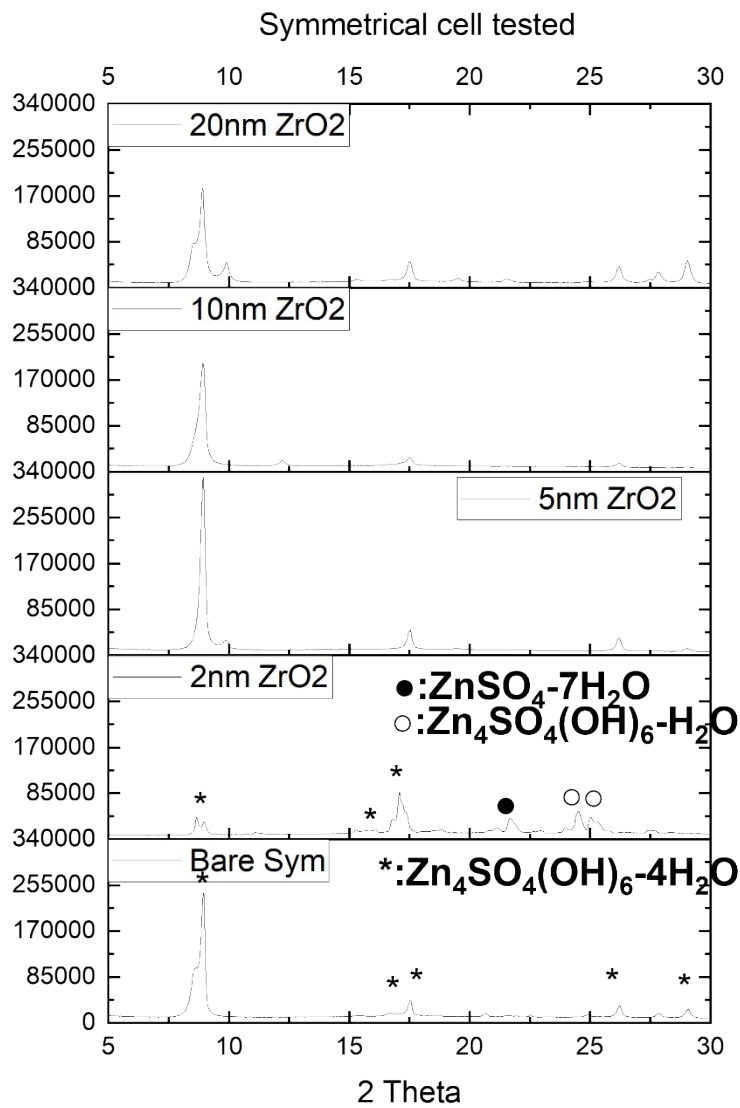

Figure S5. XRD of Zn electrode after symmetrical cell tests with different thickness of ALD-ZrO<sub>2</sub> coating.

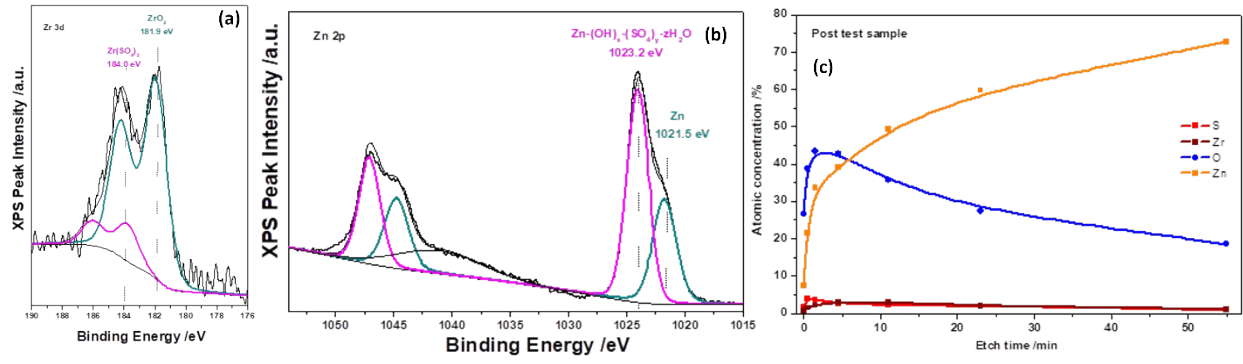

Figure S6. XPS spectra of Zr 3d, Zn 2p and depth profile of 10nm ALD- $ZrO_2@Zn$  after symmetrical cell test.

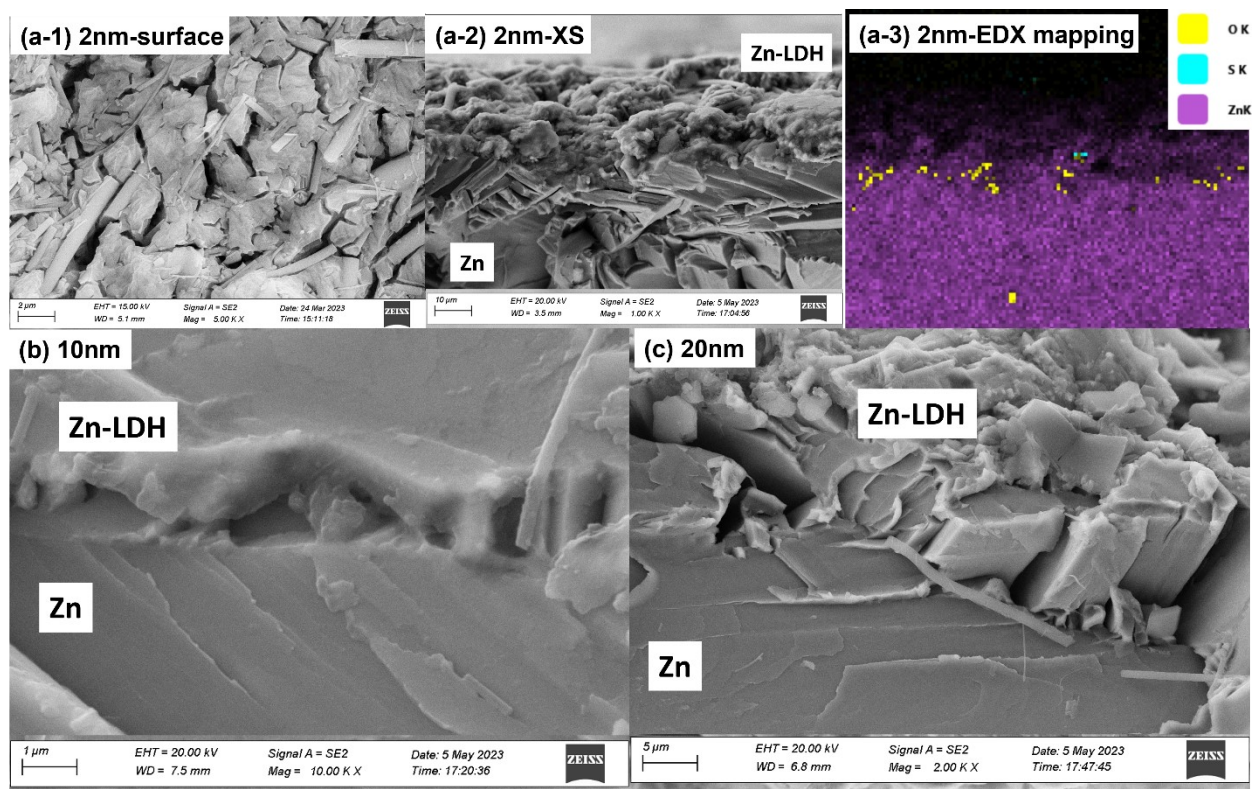

Figure S7. Zn electrode after symmetrical cell tests: SEM images of surface, cross-section, and EDX mapping of the cross-section of 2 nm ALD-ZrO<sub>2</sub>@Zn and cross-section views of 10 and 20 nm ALD-ZrO<sub>2</sub>@Zn.

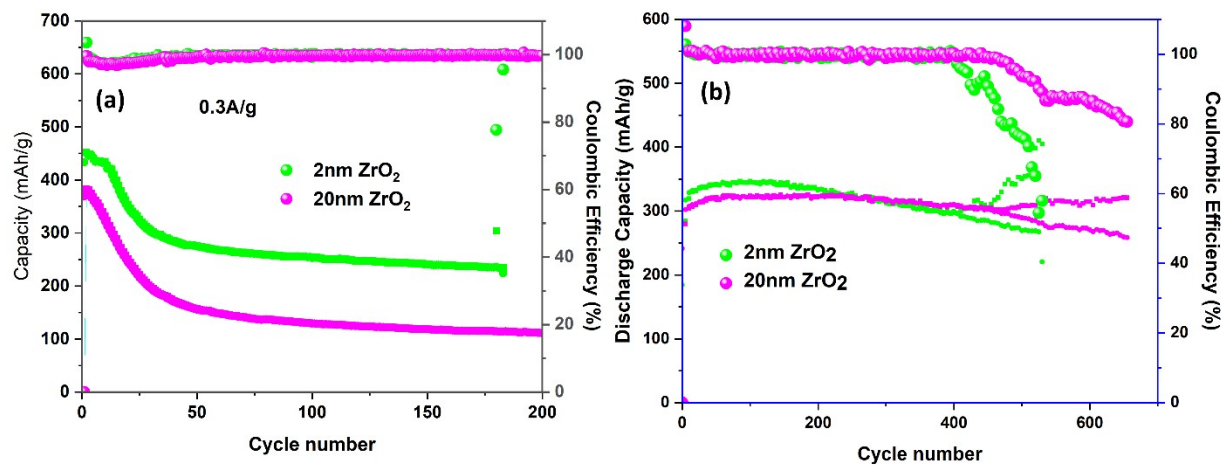

Figure S8. Discharge capacities for batteries with (a) 2 and 20 nm ALD-ZrO<sub>2</sub>@Zn as anode at rate of 0.3A/g, and (b) 2 nm and 20 nm ALD-ZrO<sub>2</sub>@ Zn as anode at rate of 2A/g.



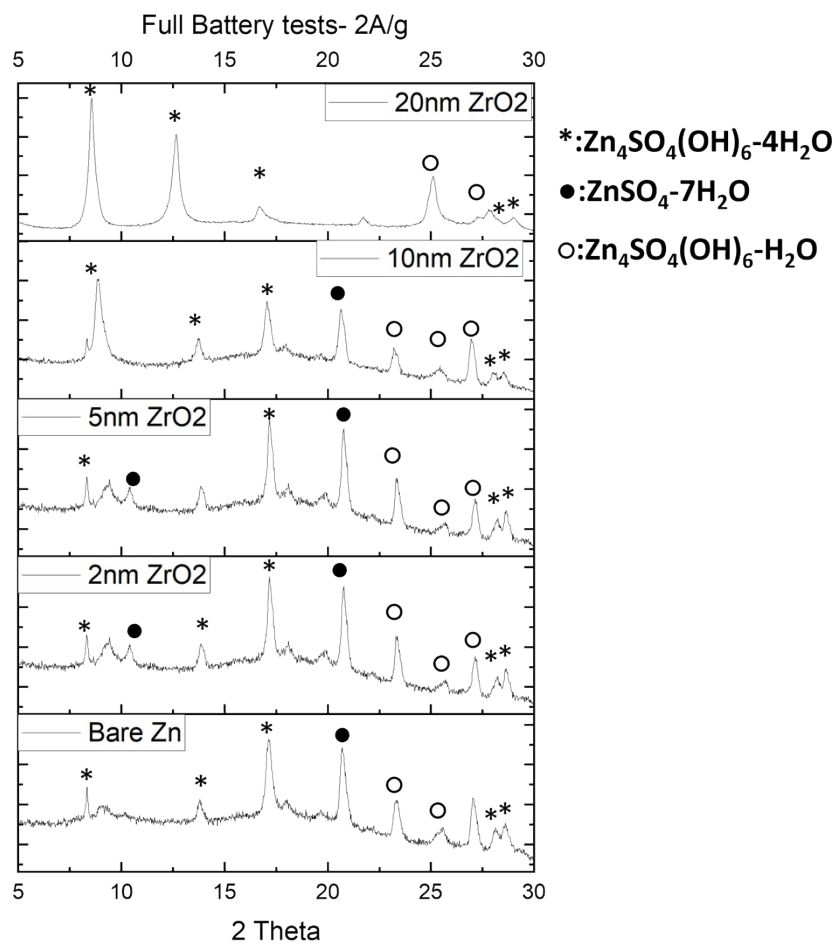

Figure S9. XRD of Zn anode after full batteries tests at 2 A/g without/with ALD-ZrO<sub>2</sub> coating.

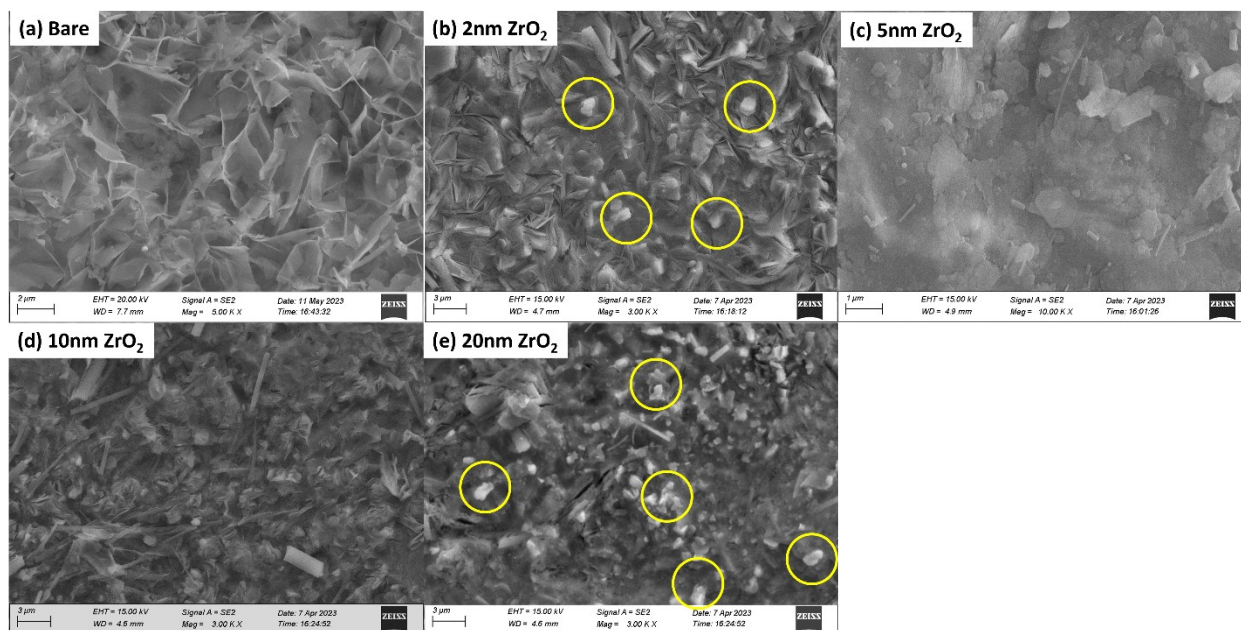

Figure S10. SEM images of the surface of Zn anodes after full battery testing at 2A/g; nucleation sites are labeled with yellow circles.

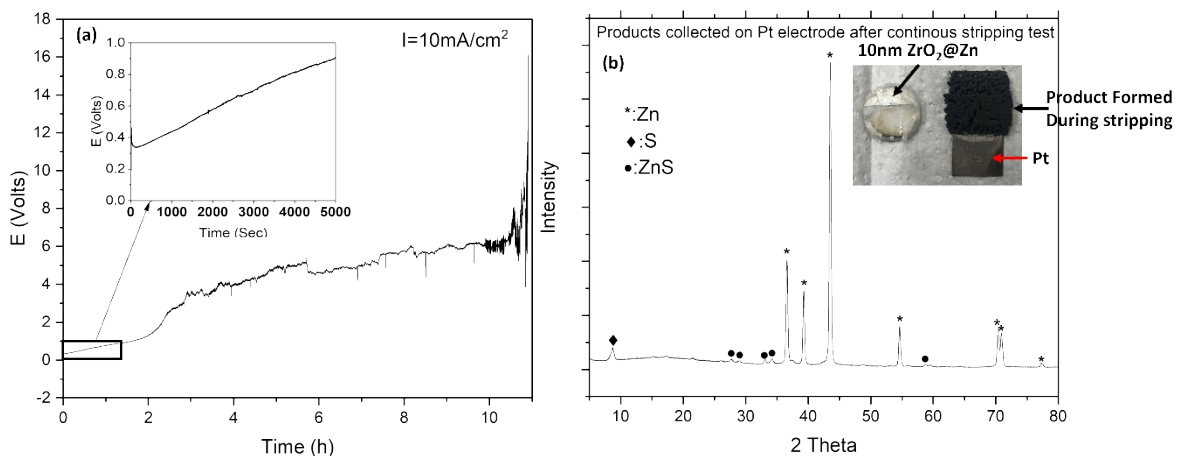

Figure S11. (a) Voltage vs. time plot under continuous stripping of zinc at constant current of  $10 \text{ mA/cm}^2$  using 3-electrode setup with  $10 \text{ nmZrO}_2@Zn$  as WE,  $\text{Ag/AgCl}$  as RE and Pt as CE, and (b) XRD pattern of formed products and optical image of  $10 \text{ nmZrO}_2@Zn$  plate and Pt plate after continuous stripping.
